# Supplementary material for: Transcriptional comparison of the filamentous fungus Neurospora crassa growing on three major monosaccharides D-glucose, D-xylose and L-arabinose
Source: PubMed Central journal article supplement (PMC4015282; doi:10.1186/1754-6834-7-31), 2014-02-28

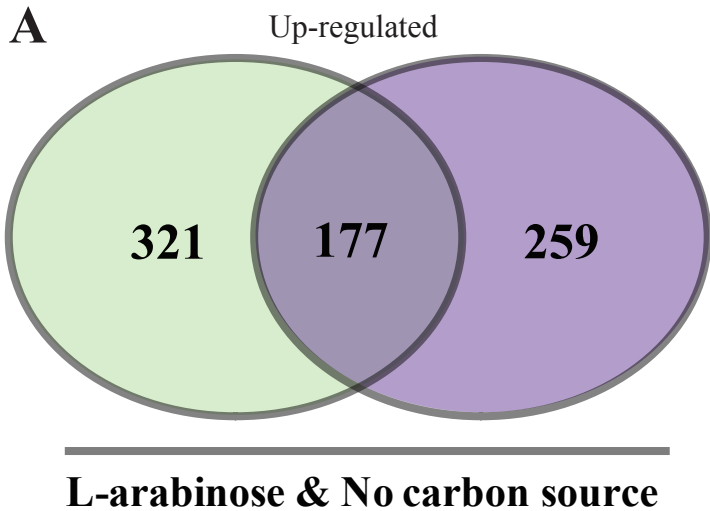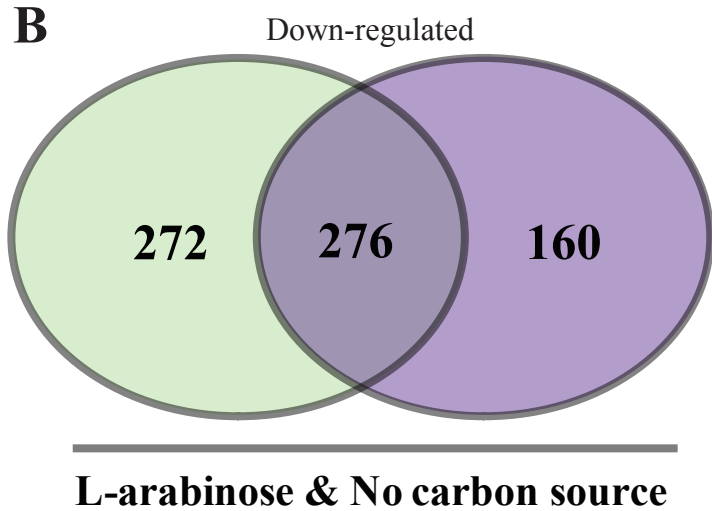

Supplement: 1754-6834-7-31-S5.pdf [file 1754-6834-7-31-S5.pdf]
